# Supplementary material for: IL-17RA in Non-Hematopoietic Cells Controls CXCL-1 and 5 Critical to Recruit Neutrophils to the Lung of Mycobacteria-Infected Mice during the Adaptive Immune Response
Source: PubMed Central journal article supplement (PMC4752258; doi:10.1371/journal.pone.0149455), 2016-02-12

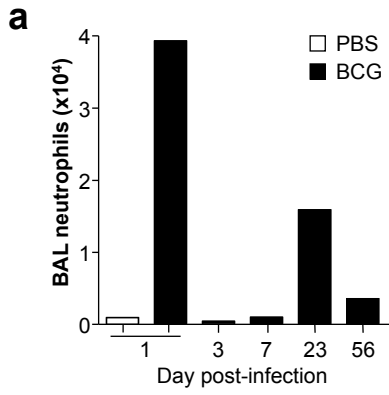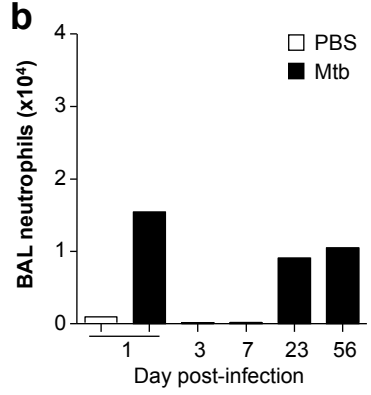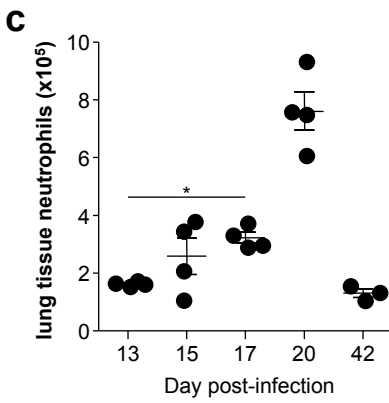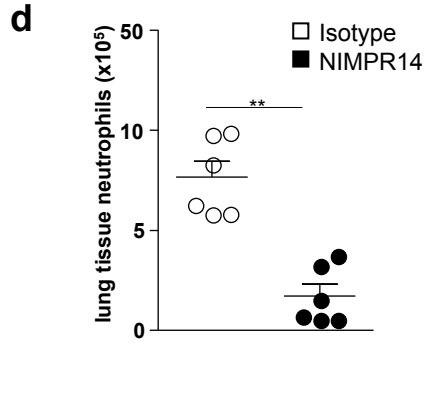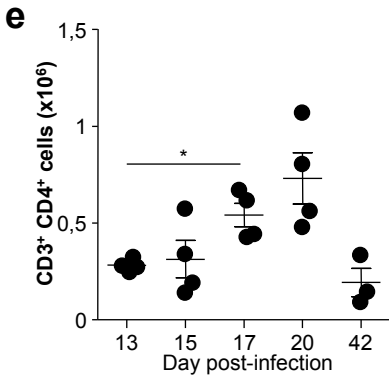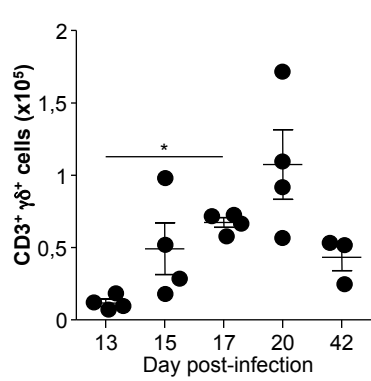

Supplement: pone.0149455.s002.pdf [file pone.0149455.s002.pdf]
